# Supplementary figures and images for: The Demethoxy Derivatives of Curcumin Exhibit Greater Differentiation Suppression in 3T3-L1 Adipocytes Than Curcumin: A Mechanistic Study of Adipogenesis and Molecular Docking
Source: MDPI journal article supplement (doi:10.3390/biom11071025), 2021-07-14

(A)

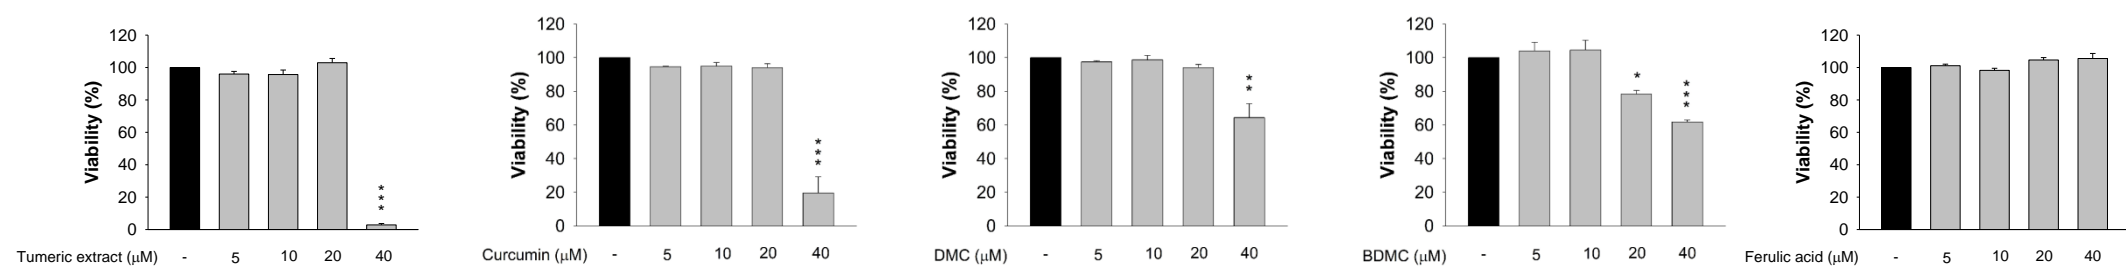

(B)

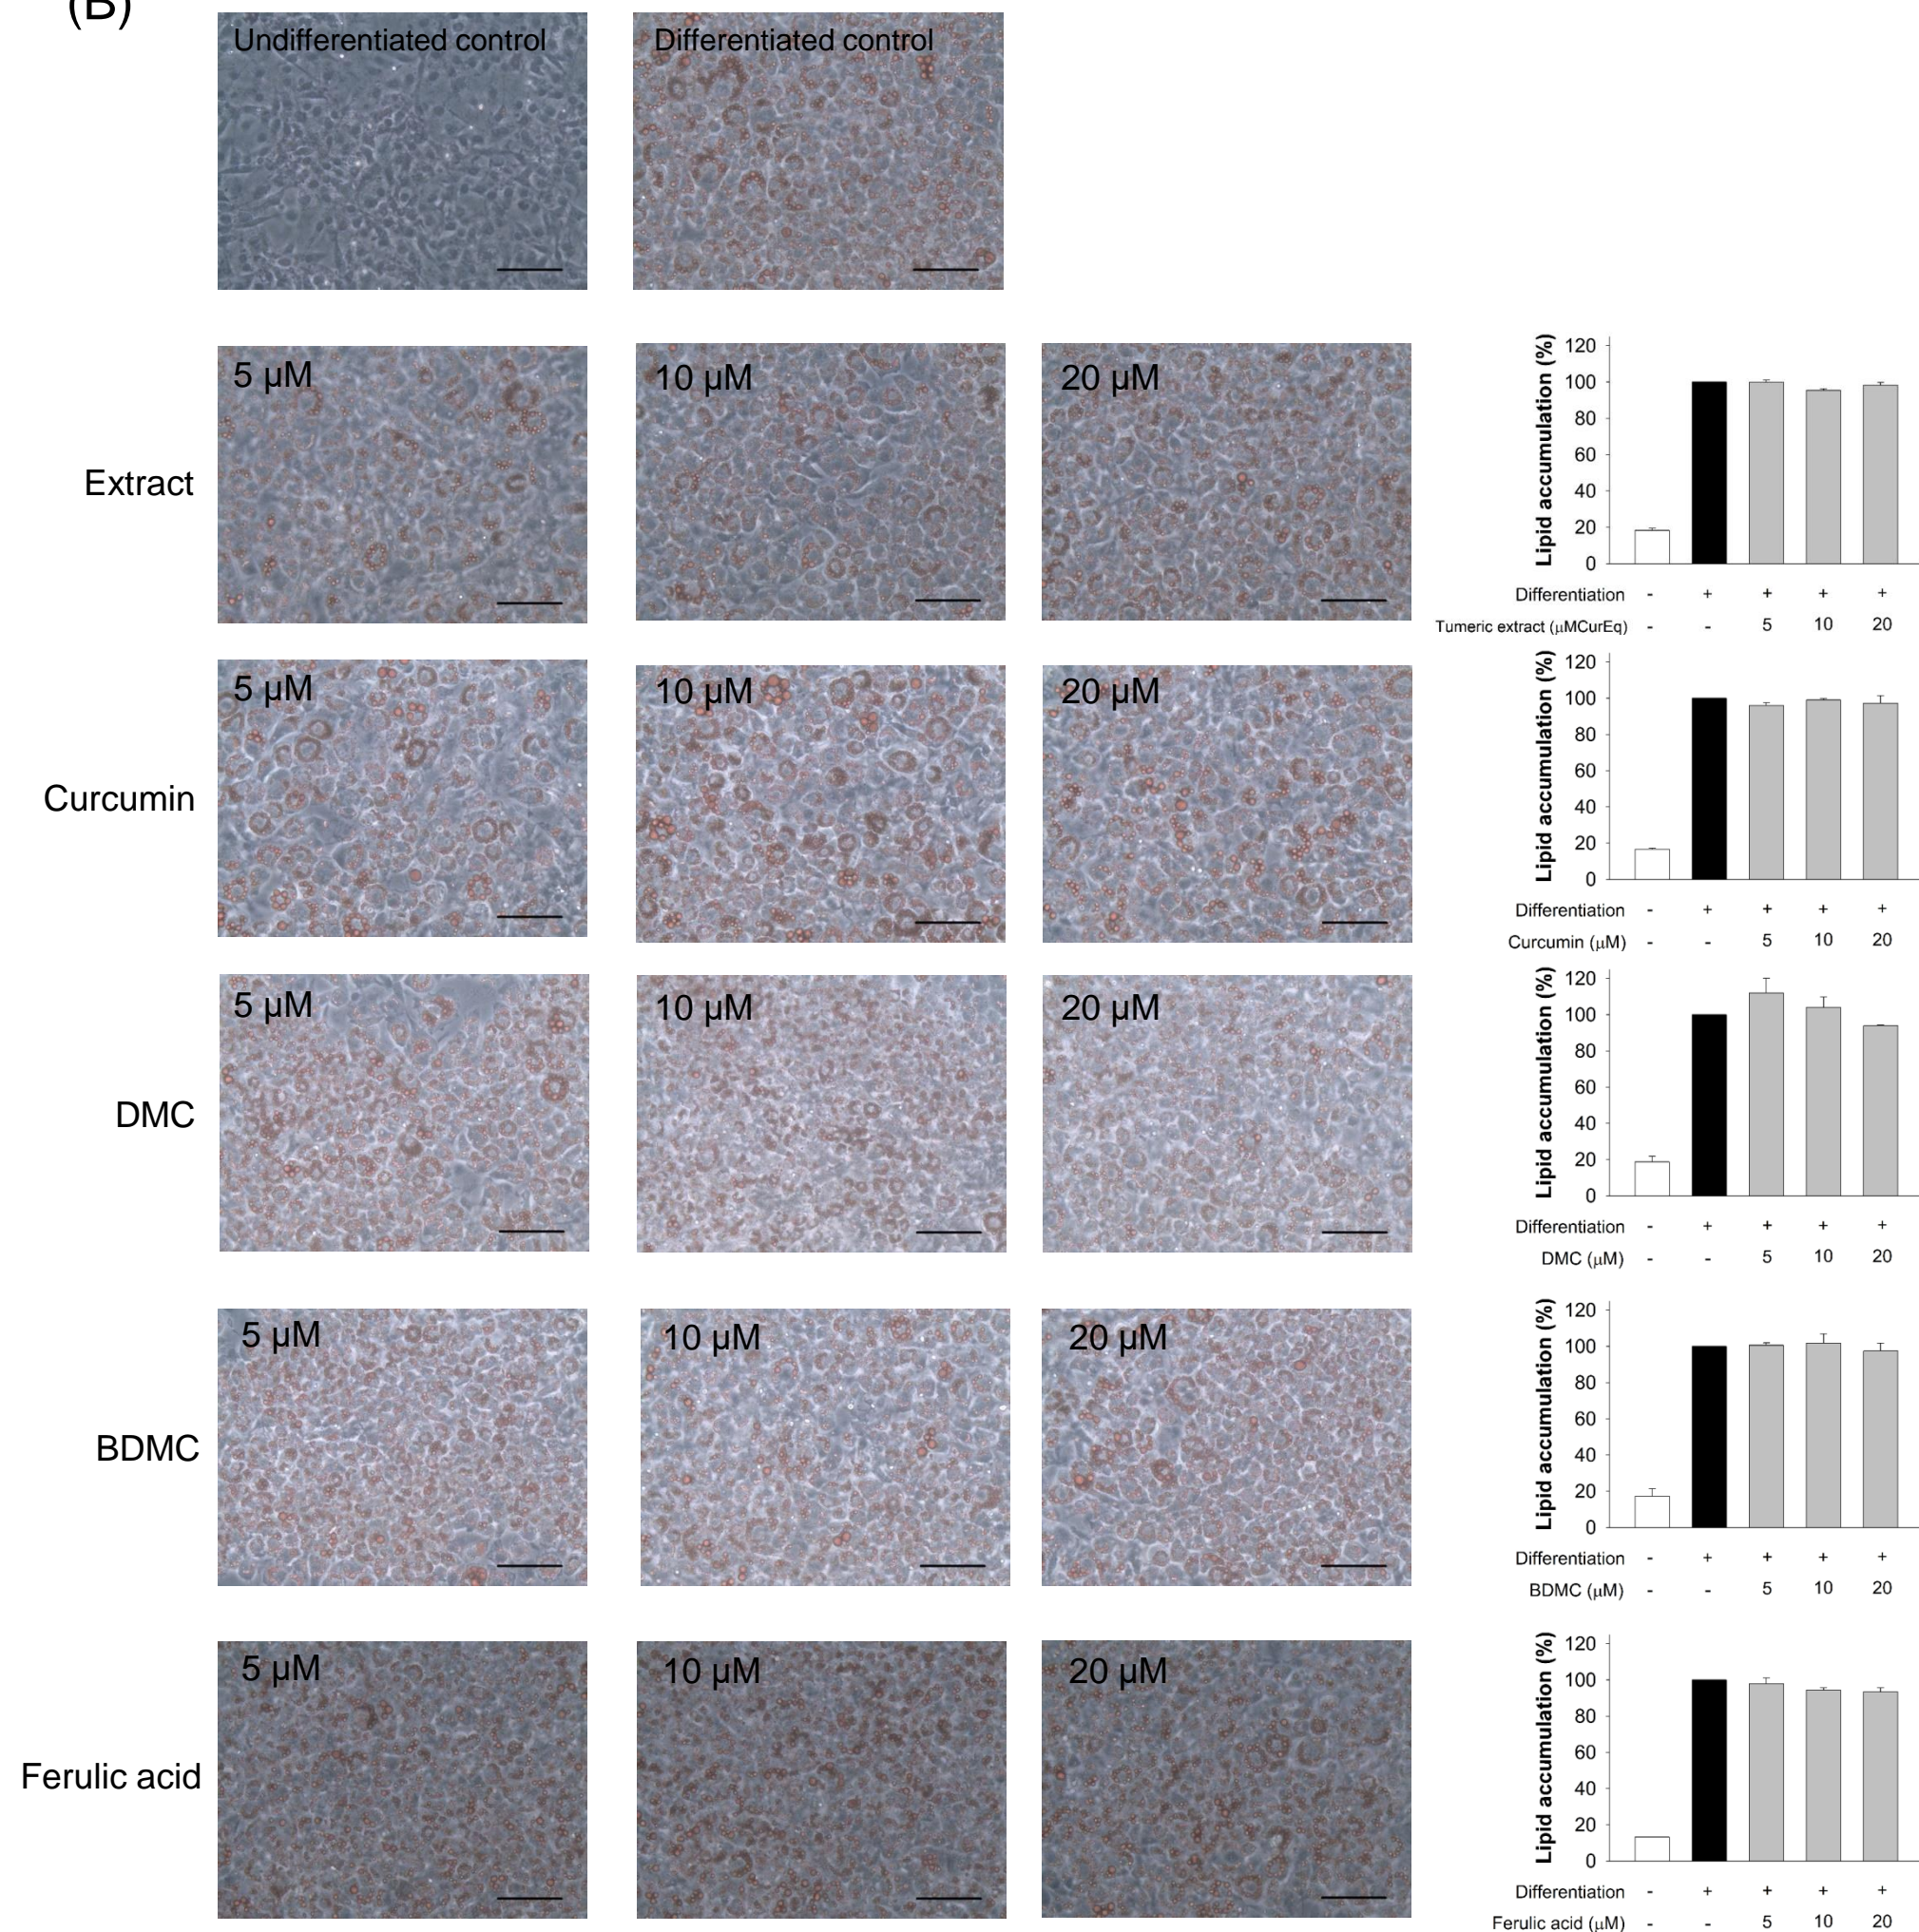

Suppl. Fig. 1

Supplement: s1 [file s1]
